# Supplementary material for: Positron emission tomography imaging of tumor angiogenesis and monitoring of antiangiogenic efficacy using the novel tetrameric peptide probe 64Cu-cyclam-RAFT-c(-RGDfK-)4
Source: PubMed Central journal article supplement (PMC3496517; doi:10.1007/s10456-012-9281-1), 2012-05-29

## Supplemental Figure 1

Correlation between tumor  $^{64}\text{Cu}$ -cyclam-RAFT-c(-RGDfK-)<sub>4</sub> uptake expressed as %ID/g (mean  $\pm$  SD) and corresponding HuH-7 tumor MVD (%). %ID/g was measured by biodistribution assay

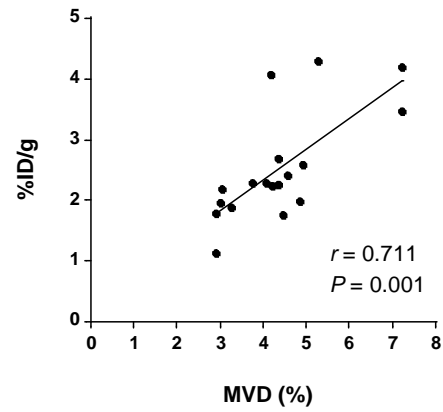

## Supplemental Figure 2

Correlation between tumor  $^{64}\text{Cu}$ -cyclam-RAFT-c(-RGDfK-)<sub>4</sub> uptake expressed as SUV (mean or max) and corresponding HuH-7 tumor MVD (%). SUV was measured by quantitative PET imaging

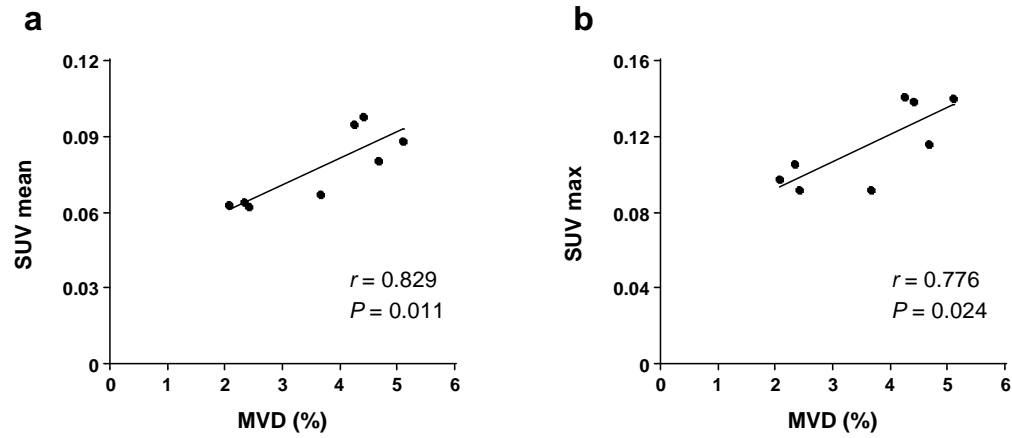

## Supplemental Figure 3

Immunofluorescence staining of CD31 and CD105  
of serial HuH-7 tumor sections

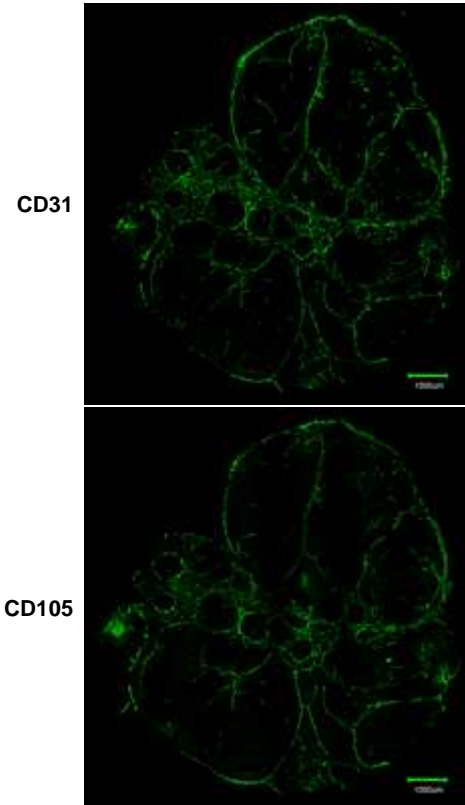

## Supplemental Figure 4

Double immunofluorescence staining of CD31 and CD61 of HuH-7 tumor section, with nuclei stained with DAPI

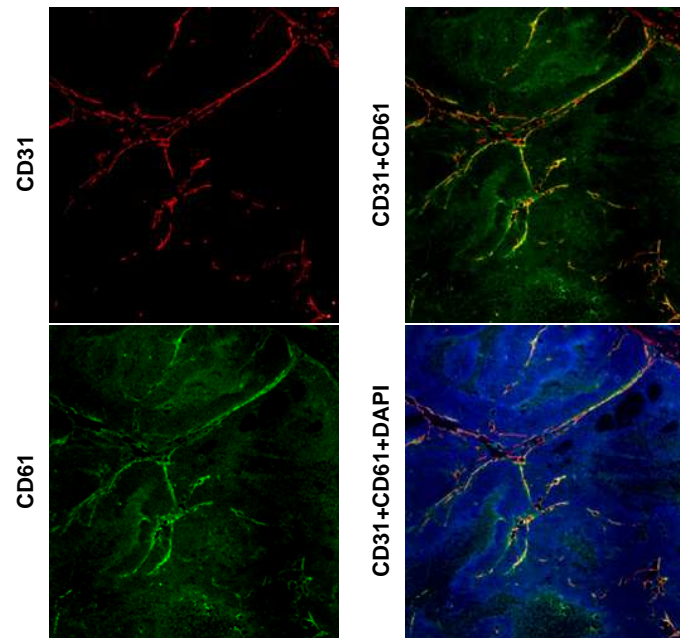

## Supplemental Figure 5

Autoradiographic examination and double immunofluorescence staining of CD31 and CD61 with the same kidney sections from mice treated with vehicle or TSU-68, with nuclei stained with DAPI

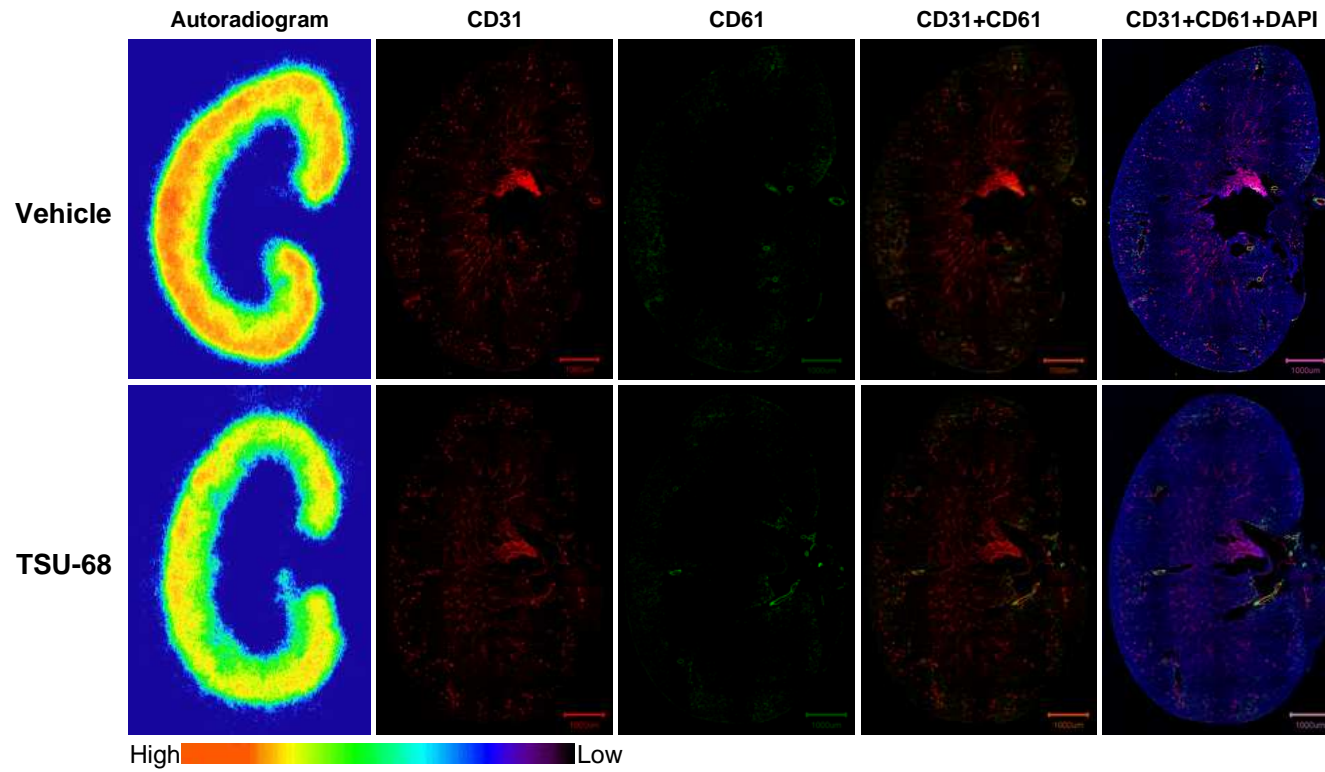

Supplement: 10456_2012_9281_MOESM1_ESM.pdf [file 10456_2012_9281_MOESM1_ESM.pdf]
